# Supplementary material
Source: publisher figshare collection journal article supplement (https://diabetesjournals.figshare.com/articles/dataset/_/25833832)
Supplement: Supplementary file 1 [file 1]

## Sheet: STable1_pPS
Supplementary Table 1: Cluster-specific Partitioned Polygenic Scores and Sample standard deviation for the five pPS																				variant	locus	VAR_ID_hg19	MarkerName	T2D_risk_allele
Beta Cell Cluster (N=30)				Proinsulin (N=7)				Obesity (N=5)				Lipodystrophy (N=20)				Liver/Lipid (N=5)				rs2296172	MACF1	1_39835817_A_G	chr1:39608404	G
SNP	Allele	weight		SNP	Allele	weight		SNP	Allele	weight		SNP	Allele	weight		SNP	Allele	weight		rs17106184	FAF1	1_50909985_G_A	chr1:50682573	G
rs10830961	G	3.80581		rs1552224	A	4.48401		rs11075990	G	4.96274		rs2943641	C	3.00777		rs780094	C	5.33953		rs10923931	NOTCH2	1_120517959_G_T	chr1:120319482	T
rs7756992	G	3.04885		rs1359790	G	1.07329		rs12970134	A	2.7831		rs13389219	C	2.73799		rs16996148	T	2.05409		rs340874	PROX1	1_214159256_T_C	chr1:212225879	C
rs4502156	T	2.68245		rs10276674	C	1.00069		rs10146997	G	1.71518		rs2881654	G	2.10695		rs9271775	T	0.975506		rs2820443	LYPLAL1	1_219753509_T_C	chr1:217820132	T
rs1111875	C	2.65615		rs4402960	T	0.969493		rs3736505	G	1.23976		rs2820443	T	1.91856		rs738408	T	0.841476		rs780094	GCKR	2_27741237_T_C	chr2:27594741	C
rs7903146	T	2.46773		rs11063069	G	0.812263		rs6742799	A	1.03627		rs459193	G	1.79895		rs7961581	C	0.832409		rs10203174	THADA	2_43690030_C_T	chr2:43543534	C
rs3802177	G	2.40699		rs4812829	A	0.793323						rs2925979	T	1.74354						rs243021	BCL11A	2_60584819_G_A	chr2:60438323	A
rs10811661	T	1.76598		rs11257655	T	0.780257						rs3996352	A	1.62802						rs6742799	RBMS1	2_161317460_A_C	chr2:161025706	A
rs11257655	T	1.58695										rs10503669	C	1.53634						rs13389219	GRB14	2_165528876_C_T	chr2:165237122	C
rs7965349	C	1.55517										rs3843467	T	1.30897						rs2943641	IRS1	2_227093745_T_C	chr2:226801989	C
rs1371135	T	1.54231										rs702634	A	1.28622						rs2881654	PPARG	3_12396955_G_A	chr3:12371955	G
rs17265513	C	1.36929										rs11708067	A	1.24242						rs1496653	UBE2E2	3_23454790_A_G	chr3:23429794	A
rs1496653	A	1.34983										rs9891146	T	1.07818						rs2276853	KIF9	3_47282303_G_A	chr3:47257307	A
rs1996546	G	1.34882										rs3132524	C	1.05609						rs6795735	ADAMTS9	3_64705365_C_T	chr3:64680405	C
rs12899811	G	1.26205										rs2296172	G	1.0313						rs11708067	ADCY5	3_123065778_A_G	chr3:124548468	A
rs8108269	G	1.25476										rs4457053	G	0.964187						rs4402960	IGF2BP2	3_185511687_G_T	chr3:186994381	T
rs17676067	C	1.2156										rs2276853	A	0.955534						rs6808574	LPP	3_187740523_T_C	chr3:189223217	C
rs5215	C	1.19072										rs6795735	C	0.949143						rs4458523	WFS1	4_6289986_T_G	chr4:6340887	G
rs233449	G	1.18444										rs11063069	G	0.938118						rs6813195	TMEM154	4_153520475_C_T	chr4:153739925	C
rs505922	C	1.16922										rs17106184	G	0.812159						rs1996546	ACSL1	4_185714289_G_T	chr4:185951283	G
rs516946	C	1.12099										rs1106240	T	0.786263						rs702634	ARL15	5_53271420_G_A	chr5:53307177	A
rs10758593	A	1.09357																		rs459193	ANKRD55	5_55806751_A_G	chr5:55842508	G
rs4430796	G	1.03812																		rs4457053	ZBED3	5_76424949_G_A	chr5:76460705	G
rs9921586	G	1.00537																		rs9502570	RREB1	6_7258617_C_T	chr6:7203616	C
rs2184061	A	0.971469																		rs7756992	CDKAL1	6_20679709_A_G	chr6:20787688	G
rs2334499	T	0.958817																		rs3132524	POU5F1	6_31136714_T_C	chr6:31244693	C
rs11708067	A	0.91934																		rs9271775	HLA-DQA1	6_32594328_C_T	chr6:32702306	T
rs15563	G	0.88323																		rs4407733	SLC35D3	6_137299152_A_G	chr6:137340845	A
rs4812829	A	0.84393																		rs2191349	DGKB	7_15064309_G_T	chr7:15030834	T
rs3736505	G	0.780543																		rs864745	JAZF1	7_28180556_T_C	chr7:28147081	T
rs17791513	A	0.77635																		rs3996352	KLF14	7_130444934_A_G	chr7:130095474	A
																				rs1182397	MNX1	7_157031407_T_G	chr7:156724168	G
blue highlighted boxes indicate SNPs for which proxies were chosen to avoid A/T and C/G ambiguous alleles																				rs10503669	LPL	8_19847690_C_A	chr8:19891970	C
																				rs516946	ANK1	8_41519248_T_C	chr8:41638405	C
Sample standard deviation for the five pPS																				rs7845219	TP53INP1	8_95937502_T_C	chr8:96006678	T
Variable	N	Mean	Std Dev	Minimum	Maximum															rs3802177	SLC30A8	8_118185025_G_A	chr8:118254206	G
Beta Cell pPS	2647	47.2142	5.96236	26.78	64.79															rs10758593	GLIS3	9_4292083_G_A	chr9:4282083	A
Proinsulin pPS	2647	11.9507	2.39155	0.79	18.24															rs10811661	CDKN2A_B	9_22134094_T_C	chr9:22124094	T
Obesity pPS	2647	8.76644	4.21169	0	20.72															rs17791513	TLE4	9_81905590_A_G	chr9:81095410	A
Lipodystrophy pPS	2647	34.6774	4.38935	16.53	49.26															rs2796441	TLE1	9_84308948_G_A	chr9:83498768	G
Liver/Lipid pPS	2647	9.70567	3.83812	0	18.4															rs505922	ABO	9_136149229_T_C	chr9:135139050	C
																				rs11257655	CDC123/CAMK1D	10_12307894_C_T	chr10:12347900	T
																				rs4746890	NEUROG3	10_71470390_T_C	chr10:71140396	T
																				rs12571751	ZMIZ1	10_80942631_A_G	chr10:80612637	A
																				rs1111875	HHEX	10_94462882_C_T	chr10:94452862	C
																				rs7903146	TCF7L2	10_114758349_C_T	chr10:114748339	T
																				rs2421016	PLEKHA1	10_124167512_C_T	chr10:124157502	C
																				rs2334499	DUSP8	11_1696849_C_T	chr11:1653425	T
																				rs10840595	INS-IGF2	11_2231273_C_T	chr11:2187849	C
																				rs2237892	KCNQ1	11_2839751_C_T	chr11:2796327	C
																				rs5215	KCNJ11	11_17408630_C_T	chr11:17365206	C
																				rs3736505	HSD17B12	11_43876435_A_G	chr11:43833011	G
																				rs11227234	MAP3K11	11_65365171_G_T	chr11:65121747	T
																				rs1552224	ARAP1	11_72433098_A_C	chr11:72110746	A
																				rs10830961	MTNR1B	11_92694757_A_G	chr11:92334405	G
																				rs11063069	CCND2	12_4374373_A_G	chr12:4244634	G
																				rs10842994	KLHDC5	12_27965150_C_T	chr12:27856417	C
																				rs2261181	HMGA2	12_66212318_C_T	chr12:64498585	T
																				rs7961581	TSPAN8/LGR5	12_71663102_C_T	chr12:69949369	C
																				rs7965349	HNF1A	12_121471931_C_T	chr12:119956314	C
																				rs1106240	MPHOSPH9	12_123626982_C_T	chr12:122192935	T
																				rs1359790	SPRY2	13_80717156_G_A	chr13:79615157	G
																				rs10146997	NRXN3	14_79945162_A_G	chr14:79014915	G
																				rs4502156	C2CD4A	15_62383155_T_C	chr15:60170447	T
																				rs7178572	HMG20A	15_77747190_A_G	chr15:75534245	G
																				rs2866367	ZFAND6	15_80365745_T_G	chr15:78152800	G
																				rs1371135	AP3S2	15_90391270_T_C	chr15:88192274	T
																				rs12899811	PRC1	15_91544076_A_G	chr15:89345080	G
																				rs11075990	FTO	16_53819893 _A_G	chr16:52377394	G
																				rs9921586	CTRB2	16_75245003_G_T	chr16:73802504	G
																				rs2925979	CMIP	16_81534790_T_C	chr16:80092291	T
																				rs8068804	ZZEF1	17_3985864_G_A	chr17:3932613	A
																				rs17676067	GLP2R	17_9791375_T_C	chr17:9732100	C
																				rs4430796	HNF1B	17_36098040_G_A	chr17:33172153	G
																				rs15563	GIP	17_47005193_A_G	chr17:44360192	G
																				rs9891146	C17orf58	17_65988049_T_C	chr17:63418511	T
																				rs9948462	LAMA1	18_7076836_C_T	chr18:7066836	T
																				rs12970134	MC4R	18_57884750_G_A	chr18:56035730	A
																				rs16996148	CILP2	19_19658472_G_T	chr19:19519472	T
																				rs8108269	GIPR	19_46158513_T_G	chr19:50850353	G
																				rs4812829	HNF4A	20_42989267_G_A	chr20:42422681	A
																				rs17265513	ZHX3	20_39832628_T_C	chr20:39266042	C
																				rs738408	PNPLA3	22_44324730_C_T	chr22:42656063	T
																				rs36608	MTMR3	22_30342191_A_G	chr22:28672191	A
																				rs3843467	ANKRD55_2	5_55856375_G_T	chr5:55892132	T
																				rs10276674	DGKB_2	7_14922007_T_C	chr7:14888532	C
																				rs2184061	CDKN2A_2	9_22061562_C_A	chr9:22051562	A
																				rs10757282	CDKN2A_3	9_22133984_T_C	chr9:22123984	C
																				rs231361	KCNQ1_1	11_2691500_G_A	chr11:2648076	A
																				rs233449	KCNQ1_2	11_2843803_G_A	chr11:2800379	G
																				rs384037	KCNQ1_3	11_2912553_G_A	chr11:2869129	A
																				rs10219509	CCND2_2	12_4300809_T_C	chr12:4171070	C
																				rs1800961	HNF4A_2	20_43042364_C_T	chr20:42475778	T

## Sheet: STable 2 Baseline_SD
Supplementary Table 2: pPS associatons with baseline characteristics
Adjusted for sex, age at randomization, principal components
All										White only
n=2647						Exponential				n=1468						Exponential
Outcome	GRS	Estimate	LowerCL	UpperCL	Probt	Estimate	LowerCL	UpperCL		Outcome	GRS	Estimate	LowerCL	UpperCL	Probt	Estimate	LowerCL	UpperCL
BMI, kg/m2	Beta Cell	-0.64964	-0.893404	-0.406472	1.7e-07					BMI, kg/m2	Beta Cell	-0.700896	-1.0275	-0.374884	2.5523e-05
	Proinsulin	-0.030114	-0.28202	0.221792	0.814						Proinsulin	-0.013145	-0.32265	0.296121	0.933
	Obesity	0.267756	0.023576	0.512357	0.032						Obesity	0.373006	0.047994	0.697597	0.024
	Lipodystrophy	-0.548311	-0.79459	-0.301593	1.3024e-05						Lipodystrophy	-0.657183	-0.983799	-0.330567	8.0132e-05
	Liver/Lipid	0.006144	-0.23808	0.250368	0.961						Liver/Lipid	-0.009984	-0.330624	0.31104	0.952
Waist, cm	Beta Cell	-1.22895	-1.77727	-0.680632	1.1185e-05					Waist, cm	Beta Cell	-1.431	-2.1611	-0.700896	0.00012223
	Proinsulin	-0.029875	-0.596544	0.537033	0.918						Proinsulin	0.027724	-0.664181	0.71939	0.937
	Obesity	0.609608	0.059361	1.15986	0.03						Obesity	1.00366	0.278281	1.72947	0.007
	Lipodystrophy	-1.45836	-2.01281	-0.90434	2.5e-07						Lipodystrophy	-1.52289	-2.25295	-0.793273	4.3137e-05
	Liver/Lipid	0.102528	-0.44736	0.652416	0.715						Liver/Lipid	0.179712	-0.5376	0.897408	0.623
Log ISI (Sensitivity)	Beta Cell	0.005364	0.000596	0.010728	0.036	1.00538	1.0006	1.01079		Log ISI	Beta Cell	0.04172	0.013112	0.069732	0.004	1.0426	1.0132	1.07222
	Proinsulin	0.005019	-0.000239	0.010277	0.061	1.00503	0.999761	1.01033			Proinsulin	0.024617	-0.002151	0.051385	0.071	1.02492	0.997851	1.05273
	Obesity	0.002526	-0.002526	0.007999	0.295	1.00253	0.997477	1.00803			Obesity	0.015577	-0.01263	0.043784	0.275	1.0157	0.987449	1.04476
	Lipodystrophy	-0.007024	-0.012292	-0.002195	0.007	0.993001	0.987783	0.997807			Lipodystrophy	-0.027218	-0.055753	0.000878	0.059	0.973149	0.945773	1.00088
	Liver/Lipid	-0.00192	-0.006912	0.003456	0.498	0.998082	0.993112	1.00346			Liver/Lipid	-0.018048	-0.045696	0.0096	0.201	0.982114	0.955332	1.00965
Log IGRAT	Beta Cell	-9.11046	-12.6972	-5.52432	6.39e-07	0.000110504	3.05973e-06	0.00398856		Log IGRAT	Beta Cell	-0.066752	-0.102512	-0.031588	0.00022135	0.935427	0.902567	0.968906
	Proinsulin	-2.23537	-5.99914	1.52841	0.244	0.106953	0.00248089	4.61082			Proinsulin	-0.027485	-0.061423	0.006692	0.114	0.972889	0.940425	1.00671
	Obesity	-3.12508	-6.73684	0.486676	0.09	0.0439333	0.00118639	1.6269			Obesity	0.010525	-0.02526	0.045889	0.564	1.01058	0.975056	1.04696
	Lipodystrophy	2.95359	-0.701961	6.60871	0.113	19.1747	0.495612	741.523			Lipodystrophy	0.026779	-0.009219	0.062338	0.144	1.02714	0.990823	1.06432
	Liver/Lipid	1.51142	-2.0951	5.11757	0.411	4.53318	0.123057	166.929			Liver/Lipid	0.030336	-0.004608	0.065664	0.089	1.0308	0.995403	1.06787
Log CIR	Beta Cell	-0.046488	-0.06258	-0.030396	1.5e-08	0.954576	0.939338	0.970061		Log CIR	Beta Cell	-0.06854	-0.100128	-0.036356	2.4935e-05	0.933756	0.904722	0.964297
	Proinsulin	-0.015535	-0.032504	0.001434	0.073	0.984585	0.968019	1.00144			Proinsulin	-0.037762	-0.068593	-0.006931	0.016	0.962942	0.933707	0.993093
	Obesity	-0.011367	-0.027365	0.005052	0.178	0.988697	0.973006	1.00506			Obesity	0.007578	-0.024839	0.039574	0.65	1.00761	0.975467	1.04037
	Lipodystrophy	0.014926	-0.001317	0.031608	0.072	1.01504	0.998684	1.03211			Lipodystrophy	0.024584	-0.007902	0.056631	0.138	1.02489	0.992129	1.05827
	Liver/Lipid	-0.000768	-0.01728	0.01536	0.913	0.999232	0.982868	1.01548			Liver/Lipid	0.006528	-0.02496	0.0384	0.678	1.00655	0.975349	1.03915
Log Triglycerides, mg/dl	Beta Cell	-2.82802	-6.46958	0.812944	0.128	0.0591298	0.00154988	2.25454		Log Triglycerides, mg/dl	Beta Cell	-0.006556	-0.03278	0.019668	0.615	0.993465	0.967751	1.01986
	Proinsulin	0.374752	-3.37611	4.12538	0.845	1.45463	0.03418	61.8913			Proinsulin	-0.000956	-0.025573	0.0239	0.941	0.999044	0.974751	1.02419
	Obesity	0.865576	-2.77944	4.51059	0.641	2.37637	0.0620731	90.9758			Obesity	-0.007578	-0.03368	0.018524	0.573	0.992451	0.966881	1.0187
	Lipodystrophy	4.07436	0.393344	7.75537	0.03	58.8128	1.48193	2334.08			Lipodystrophy	0.024584	-0.001756	0.050485	0.067	1.02489	0.998246	1.05178
	Liver/Lipid	-9.37152	-12.9911	-5.75194	3.88e-07	8.51139e-05	2.28053e-06	0.00317662			Liver/Lipid	-0.054912	-0.080256	-0.029184	2.5367e-05	0.946568	0.92288	0.971238
HbA1c, %	Beta Cell	-0.000596	-0.019072	0.01788	0.943					HbA1c, %	Beta Cell	0.004172	-0.018476	0.02682	0.726
	Proinsulin	0.016013	-0.003346	0.035133	0.104						Proinsulin	0.015296	-0.005975	0.036328	0.161
	Obesity	-0.006736	-0.02526	0.012209	0.491						Obesity	-0.007578	-0.029891	0.014735	0.515
	Lipodystrophy	0.007463	-0.011414	0.02634	0.43						Lipodystrophy	0.005268	-0.017121	0.028096	0.636
	Liver/Lipid	0.00576	-0.012672	0.024576	0.53						Liver/Lipid	0.004224	-0.017664	0.026112	0.707
Log Fasting Insulin, uU/mL	Beta Cell	-1.20273	-1.78144	-0.624012	4.6326e-05	0.300374	0.168395	0.535791		Log Fasting Insulin, uU/mL	Beta Cell	-0.0447	-0.07152	-0.017284	0.001	0.956284	0.930978	0.982865
	Proinsulin	-0.645539	-1.24256	-0.048278	0.034	0.52438	0.288644	0.952869			Proinsulin	-0.027724	-0.053536	-0.001912	0.035	0.972657	0.947872	0.99809
	Obesity	-0.419737	-1.0003	0.160822	0.157	0.65722	0.367771	1.17448			Obesity	-0.015577	-0.042521	0.011788	0.263	0.984544	0.95837	1.01186
	Lipodystrophy	0.493436	-0.093946	1.08038	0.1	1.63793	0.910332	2.9458			Lipodystrophy	0.028096	0.000878	0.055753	0.044	1.02849	1.00088	1.05734
	Liver/Lipid	0.206208	-0.374016	0.786048	0.486	1.22901	0.687966	2.19471			Liver/Lipid	0.011904	-0.014976	0.0384	0.389	1.01198	0.985136	1.03915
Log PIR_C	Beta Cell	0.010132	0.004768	0.0149	8.8549e-05	1.01018	1.00478	1.01501		Log PIR_C	Beta Cell	0.039932	0.0149	0.06556	0.002	1.04074	1.01501	1.06776
	Proinsulin	-0.004541	-0.009799	0.000478	0.078	0.995469	0.990249	1.00048			Proinsulin	-0.027724	-0.051624	-0.003585	0.024	0.972657	0.949686	0.996421
	Obesity	-0.005052	-0.010104	0	0.048	0.994961	0.989947	1			Obesity	0.001684	-0.023576	0.026944	0.906	1.00169	0.9767	1.02731
	Lipodystrophy	0	-0.004829	0.005268	0.972	1	0.995183	1.00528			Lipodystrophy	-0.003512	-0.028974	0.02195	0.779	0.996494	0.971442	1.02219
	Liver/Lipid	-0.001536	-0.006528	0.003456	0.587	0.998465	0.993493	1.00346			Liver/Lipid	0.001152	-0.023808	0.026112	0.929	1.00115	0.976473	1.02646
ISI - 1/HOMA-IR; uses fasting insulin
IGR - insulinogenic index:
insulin release was measured by the insulinogenic index: IGR = (I30 − I0)/(G30 − G0) using timed OGTT insulin and glucose (9)
IGR=IGRAT= I30-I0/G30-G0 (uU/mg)
The natural log transformation scale was used for results.

## Sheet: STable 3 1yr traits all_SD
Supplementary Table 3: Associations with T2D pPS and Year 1 change from baseline
n=2647				Interaction Tests
				ILS vs PBL	MET vs PBL		Treatment Adjusted					PBL (n=887)					MET (n=875)					ILS (n=885)
GRS		Outcome		P val	P val		Estimate	LowerCL	UpperCL	Probt		Estimate	LowerCL	UpperCL	Probt		Estimate	LowerCL	UpperCL	Probt		Estimate	LowerCL	UpperCL	Probt
Beta Cell		BMI, kg/m2		0.88	0.448		0.051852	-0.0298	0.132908	0.212		0.142444	0.013708	0.27118	0.03		0.021456	-0.100724	0.143636	0.731		0.016688	-0.151384	0.184164	0.846
		Waist, cm		0.332	0.322		0.102512	-0.153172	0.358196	0.431		0.213368	-0.188932	0.615072	0.298		-0.299192	-0.731888	0.133504	0.175		0.4172	-0.073904	0.9089	0.096
		Triglycerides, mg/dl*		0.917	0.637		1.59966	-1.00486	4.20418	0.229		3.45978	-1.34696	8.26592	0.158		1.39285	-3.27681	6.06192	0.558		1.31776	-2.76842	5.40453	0.527
		HbA1c,%*		0.13	0.047		0.006556	-0.006556	0.019072	0.328		0.02384	-0.002384	0.050064	0.077		-0.00596	-0.025628	0.014304	0.576		0.00298	-0.016688	0.023244	0.752
		Fasting Insulin,uU/mL*		0.923	0.416		-0.33078	-0.889828	0.228864	0.247		0.12814	-0.998896	1.25458	0.823		-0.622224	-1.45782	0.213964	0.144		-0.442232	-1.38987	0.505408	0.36
		Corrected Proinsulin*^		0.294	0.178		0.004172	-0.001192	0.009536	0.14		0.007152	-0.003576	0.018476	0.192		0.001788	-0.00596	0.009536	0.611		0.002384	-0.007152	0.012516	0.603
		ISI*		0.586	0.702		0.004768	-0.000596	0.010132	0.099		0.000596	-0.006556	0.008344	0.82		0.003576	-0.005364	0.012516	0.413		0.00894	-0.002384	0.020264	0.124
		IGR*		0.295	0.108		-8.49777	-12.1661	-4.82998	5.607e-06		-11.7549	-18.7394	-4.77038	<.001		-5.34374	-11.5356	0.847512	0.091		-8.12467	-14.2015	-2.04845	0.009
		CIR*		0.386	0.085		-0.04172	-0.058408	-0.025032	9.58e-07		-0.054236	-0.085228	-0.023244	<.001		-0.025628	-0.054832	0.003576	0.085		-0.045296	-0.072116	-0.01788	0.001
Proinsulin		BMI, kg/m2		0.904	0.874		-0.05736	-0.141488	0.027007	0.182		-0.037045	-0.171124	0.097034	0.587		-0.013145	-0.139576	0.113525	0.839		-0.135513	-0.307593	0.036806	0.123
		Waist, cm		0.677	0.849		0.007648	-0.257403	0.272938	0.955		0.012667	-0.406539	0.431634	0.953		-0.035372	-0.485409	0.414665	0.877		0.007887	-0.498554	0.514328	0.976
		Triglycerides, mg/dl*		0.211	0.118		0.12906	-2.58072	2.83908	0.926		3.70498	-1.2992	8.7094	0.147		-1.18616	-6.05411	3.6818	0.633		-2.06138	-6.28451	2.16199	0.338
		HbA1c,%*		0.018	0.01		0	-0.013384	0.013145	0.992		0.022466	-0.005019	0.049712	0.11		-0.012189	-0.033221	0.008604	0.247		-0.009082	-0.029636	0.011711	0.395
		Fasting Insulin,uU/mL*		0.866	0.804		0.128343	-0.452427	0.709352	0.665		0.115676	-1.05781	1.2894	0.847		0.39913	-0.476327	1.27459	0.371		0.088908	-0.885256	1.06283	0.858
		Corrected Proinsulin*^		0.372	0.871		0.001673	-0.004063	0.007409	0.563		-0.003585	-0.015296	0.007887	0.533		0.000239	-0.007887	0.008365	0.954		0.007648	-0.00239	0.017925	0.138
		ISI*		0.969	0.791		-0.000239	-0.005975	0.005497	0.921		-0.001673	-0.00956	0.006214	0.671		-0.001434	-0.010994	0.007887	0.748		0.003107	-0.008604	0.014818	0.594
		IGR*		0.504	0.821		-2.72412	-6.56414	1.11589	0.164		-0.824072	-8.17762	6.52948	0.826		-0.568342	-7.11599	5.9793	0.865		-5.27282	-11.5313	0.985636	0.099
		CIR*		0.609	0.486		-0.010755	-0.028202	0.006692	0.226		-0.007887	-0.040391	0.024617	0.634		0.003585	-0.027246	0.034655	0.816		-0.02151	-0.049712	0.006453	0.132
Obesity		BMI, kg/m2		0.195	0.228		-0.030312	-0.111565	0.050941	0.466		0.035785	-0.08841	0.15998	0.572		-0.068623	-0.189871	0.053046	0.269		-0.057256	-0.23155	0.116617	0.518
		Waist, cm		0.343	0.069		-0.056835	-0.312803	0.199554	0.664		0.167979	-0.220183	0.556562	0.396		-0.305646	-0.73675	0.125037	0.164		-0.018945	-0.531302	0.493412	0.942
		Triglycerides, mg/dl*		0.908	0.658		1.66758	-0.950618	4.28578	0.212		1.93618	-2.70619	6.57855	0.413		2.05448	-2.63209	6.74105	0.39		1.49413	-2.76808	5.75591	0.492
		HbA1c,%*		0.102	0.884		0.005473	-0.007578	0.018103	0.407		-0.001263	-0.026944	0.024418	0.929		-0.002526	-0.022734	0.017261	0.794		0.026523	0.005894	0.047573	0.012
		Fasting Insulin,uU/mL*		0.217	0.898		0.780113	0.219341	1.34089	0.006		0.729172	-0.36206	1.81998	0.19		0.447523	-0.386899	1.28237	0.293		1.05334	0.066097	2.04101	0.037
		Corrected Proinsulin*^		0.683	0.436		-0.002947	-0.00842	0.002526	0.318		-0.005473	-0.016419	0.005473	0.317		0	-0.007999	0.007578	0.974		-0.003789	-0.014314	0.006315	0.45
		ISI*		0.788	0.41		-0.000421	-0.005894	0.005052	0.845		-0.001684	-0.008841	0.005473	0.645		0.005052	-0.003789	0.013893	0.266		-0.005473	-0.017261	0.006315	0.356
		IGR*		0.257	0.797		0.225235	-3.46904	3.91909	0.905		2.29824	-4.48618	9.08308	0.506		0.932515	-5.28818	7.15321	0.769		-2.939	-9.25568	3.37768	0.361
		CIR*		0.571	0.966		0.00421	-0.01263	0.020629	0.634		0.00842	-0.021471	0.038732	0.574		0.007157	-0.022313	0.036627	0.639		-0.006315	-0.034522	0.021892	0.662
Lipodystrophy		BMI, kg/m2		0.437	0.344		0.050046	-0.032486	0.132578	0.234		0.05268	-0.073313	0.178673	0.412		-0.068045	-0.194038	0.058387	0.291		0.15365	-0.018877	0.326177	0.081
		Waist, cm		0.149	0.317		0.243206	-0.017121	0.503972	0.067		0.200623	-0.194916	0.596601	0.32		-0.255498	-0.703717	0.192282	0.263		0.806882	0.300715	1.31349	0.002
		Triglycerides, mg/dl*		0.453	0.266		1.52904	-1.11769	4.17577	0.257		2.79819	-1.9057	7.50163	0.243		-0.884585	-5.72324	3.95363	0.72		2.87545	-1.33412	7.08502	0.18
		HbA1c,%*		0.386	0.303		0.002634	-0.010097	0.015804	0.677		0.019755	-0.006146	0.045656	0.133		-0.00878	-0.029413	0.011414	0.392		0	-0.020633	0.021072	0.986
		Fasting Insulin,uU/mL*		0.908	0.262		0.039949	-0.527239	0.607137	0.89		0.21072	-0.886341	1.30778	0.706		-0.763421	-1.62869	0.101848	0.084		0.578163	-0.399929	1.55625	0.246
		Corrected Proinsulin*^		0.525	0.07		0.001317	-0.00439	0.006585	0.691		-0.003512	-0.014487	0.007024	0.506		0.008341	0.000439	0.016243	0.042		-0.000878	-0.010975	0.009219	0.873
		ISI*		0.755	0.286		0.000878	-0.004829	0.006146	0.796		-0.002195	-0.009219	0.005268	0.59		0.007902	-0.001317	0.017121	0.09		-0.001317	-0.012731	0.010536	0.842
		IGR*		0.511	0.81		-0.025901	-3.74423	3.69199	0.989		-1.58479	-8.34012	5.17098	0.645		-0.825759	-7.26326	5.61174	0.801		2.15768	-4.12967	8.44504	0.501
		CIR*		0.681	0.708		-0.003512	-0.020194	0.013609	0.701		-0.007024	-0.037315	0.022828	0.636		-0.008341	-0.038632	0.022389	0.598		0.004829	-0.023706	0.032925	0.749
Liver/Lipid		BMI, kg/m2		0.562	0.662		-0.020352	-0.101376	0.060672	0.621		-0.01536	-0.14208	0.111744	0.814		-0.0384	-0.158592	0.081792	0.53		-0.004224	-0.172416	0.163968	0.96
		Waist, cm		0.297	0.171		-0.230784	-0.485376	0.023808	0.076		-0.102528	-0.498816	0.29376	0.612		-0.597888	-1.02298	-0.172416	0.006		0.025344	-0.469248	0.52032	0.919
		Triglycerides, mg/dl*		0.179	0.594		-4.37146	-6.98227	-1.76064	0.00103164		-6.24691	-10.9893	-1.50451	0.01		-3.62918	-8.27443	1.01606	0.126		-4.00627	-8.13888	0.12672	0.057
		HbA1c,%*		0.275	0.007		-0.010752	-0.023424	0.00192	0.098		-0.035712	-0.061824	-0.009984	0.007		0.01728	-0.002688	0.036864	0.087		-0.012288	-0.03264	0.008064	0.234
		Fasting Insulin,uU/mL*		0.349	0.069		0.196224	-0.361728	0.75456	0.49		0.735744	-0.378624	1.85011	0.195		-0.431616	-1.25952	0.396288	0.306		0.2592	-0.691584	1.20998	0.593
		Corrected Proinsulin*^		0.005	0.577		-0.00384	-0.009216	0.00192	0.187		0.00384	-0.007296	0.014976	0.502		0.000768	-0.006528	0.008448	0.808		-0.014976	-0.02496	-0.004992	0.003
		ISI*		0.013	0.337		-0.003456	-0.009216	0.00192	0.19		-0.00192	-0.009216	0.00576	0.632		0.006912	-0.00192	0.015744	0.132		-0.015744	-0.02688	-0.004224	0.007
		IGR*		0.637	0.096		0.14976	-3.51706	3.81658	0.936		2.02982	-4.89715	8.95642	0.565		-6.25075	-12.4047	-0.096384	0.047		4.80038	-1.25683	10.8576	0.12
		CIR*		0.966	0.179		0.002688	-0.014208	0.0192	0.76		0.009984	-0.020736	0.040704	0.516		-0.018432	-0.047616	0.010752	0.214		0.016128	-0.011136	0.043392	0.245
gePS		BMI, kg/m2		0.02	0.438		0.058	-0.1589	0.275	0.6		0.2474	-0.0976	0.5925	0.16		-0.1308	-0.4611	0.1995	0.437		0.0863	-0.347	0.5195	0.696
		Waist, cm		0.1	0.92		0.2145	-0.4688	0.8978	0.538		0.1543	-0.927	1.2357	0.779		-0.4114	-1.5866	0.7638	0.492		0.7767	-0.4955	2.0488	0.231
		Triglycerides, mg/dl*		0.2	0.505		2.0319	-4.9286	8.9924	0.567		9.3895	-3.5054	22.2844	0.153		-8.348	-20.9744	4.2783	0.195		5.8076	-4.783	16.3983	0.282
		HbA1c,%*		0.081	0.038		0.0202	-0.0139	0.0542	0.246		0.0402	-0.0305	0.1108	0.265		-0.0034	-0.0576	0.0507	0.901		0.0288	-0.0231	0.0808	0.276
		Fasting Insulin,uU/mL*		0.204	0.756		0.1156	-1.3815	1.6126	0.88		-1.699	-4.7151	1.317	0.269		-1.8714	-4.1502	0.4073	0.107		2.7405	0.2751	5.2059	0.029
		Corrected Proinsulin*^		0.18	0.137		0.0055	-0.0093	0.0202	0.467		0.0037	-0.0263	0.0337	0.808		-0.0027	-0.0236	0.0182	0.8		0.0123	-0.0134	0.0379	0.347
		ISI*		0.016	0.938		0.0016	-0.013	0.0163	0.825		0.0015	-0.0187	0.0217	0.886		0.0168	-0.0075	0.0412	0.176		-0.0137	-0.0431	0.0158	0.362
		IGR*		0.485	0.12		-19.4057	-29.3034	-9.5081	0.0001		-23.0089	-41.8362	-4.1816	0.017		-18.7479	-35.9037	-1.592	0.032		-16.6349	-32.4746	-0.7951	0.04
		CIR*		0.468	0.161		-0.0857	-0.1307	-0.0408	0.0002		-0.1252	-0.2085	-0.0419	0.003		-0.0853	-0.1664	-0.0042	0.039		-0.0604	-0.1315	0.0108	0.096
The original scale was used for these results. They were not log-transformed. Adjusted for age, sex, principal components, and baseline measurement
^ Proginsulin, ng/ml/Insulin, ng/ml

## Sheet: STable 4 1 yr adjustBMI_SD
Supplementary Table 4: Associations with T2D pPS and Year 1 change from baseline adjusted for BMI
n=2647				Interaction Tests
				ILS vs PBL	MET vs PBL		Treatment Adjusted					PBL (n=887)					MET (n=875)					ILS (n=885)
GRS		Outcome		P val	P val		Estimate	LowerCL	UpperCL	Probt		Estimate	LowerCL	UpperCL	Probt		Estimate	LowerCL	UpperCL	Probt		Estimate	LowerCL	UpperCL	Probt
Beta Cell		BMI, kg/m2		0.88	0.448		0.051852	-0.0298	0.132908	0.212		0.142444	0.013708	0.27118	0.03		0.021456	-0.100724	0.143636	0.731		0.016688	-0.151384	0.184164	0.846
		Waist, cm		0.321	0.321		0.1937	-0.05662	0.444616	0.129		0.29204	-0.101916	0.686592	0.146		-0.120392	-0.532824	0.29204	0.567		0.46786	-0.020264	0.955388	0.06
		Triglycerides, mg/dl*		0.934	0.656		1.8333	-0.784932	4.45152	0.17		3.56527	-1.26173	8.39287	0.147		1.67059	-3.03424	6.37541	0.486		1.68489	-2.41916	5.78954	0.421
		HbA1c,%*		0.132	0.05		0.007152	-0.00596	0.019668	0.281		0.025032	-0.001788	0.051256	0.067		-0.006556	-0.02682	0.013708	0.517		0.004172	-0.016092	0.024436	0.673
		Fasting Insulin,uU/mL*		0.923	0.524		-0.103108	-0.65262	0.446404	0.713		0.344488	-0.755132	1.44411	0.539		-0.39932	-1.22478	0.425544	0.342		-0.204428	-1.13717	0.728908	0.668
		Corrected Proinsulin*^		0.297	0.18		0.004172	-0.001192	0.009536	0.133		0.007748	-0.003576	0.019072	0.179		0.001788	-0.00596	0.009536	0.623		0.002384	-0.007152	0.012516	0.606
		ISI*		0.764	0.831		0.001788	-0.003576	0.007152	0.484		-0.000596	-0.007748	0.007152	0.9		0.000596	-0.007748	0.009536	0.867		0.004768	-0.00596	0.016092	0.389
		IGR*		0.261	0.094		-7.93753	-11.6148	-4.2608	2.3263e-05		-11.1971	-18.1762	-4.21789	0.002		-4.65118	-10.8645	1.56152	0.142		-7.85826	-13.9702	-1.74568	0.012
		CIR*		0.342	0.073		-0.039336	-0.056024	-0.022648	3.837e-06		-0.052448	-0.08344	-0.021456	0.000910147		-0.022648	-0.051852	0.007152	0.133		-0.043508	-0.070924	-0.016092	0.002
Proinsulin		BMI, kg/m2		0.904	0.874		-0.05736	-0.141488	0.027007	0.182		-0.037045	-0.171124	0.097034	0.587		-0.013145	-0.139576	0.113525	0.839		-0.135513	-0.307593	0.036806	0.123
		Waist, cm		0.68	0.521		-0.000956	-0.260032	0.258359	0.995		0.036567	-0.373796	0.447169	0.861		-0.155828	-0.583399	0.271982	0.475		0.01434	-0.488038	0.516718	0.955
		Triglycerides, mg/dl*		0.208	0.104		0.13384	-2.57523	2.84314	0.923		3.74633	-1.26407	8.75672	0.143		-1.31928	-6.19631	3.55799	0.596		-2.02051	-6.23981	2.19904	0.348
		HbA1c,%*		0.018	0.009		0	-0.013384	0.013145	0.998		0.022705	-0.004541	0.05019	0.103		-0.01195	-0.032982	0.008843	0.259		-0.008843	-0.029397	0.01195	0.406
		Fasting Insulin,uU/mL*		0.88	0.944		0.085562	-0.483258	0.654143	0.768		0.177099	-0.966277	1.32071	0.761		0.221314	-0.640759	1.08315	0.615		0.086996	-0.867809	1.0418	0.858
		Corrected Proinsulin*^		0.372	0.876		0.001673	-0.004063	0.007409	0.563		-0.003585	-0.015296	0.007887	0.541		0.000239	-0.007887	0.008365	0.947		0.007648	-0.00239	0.017925	0.138
		ISI*		0.957	0.549		0	-0.005497	0.005497	0.98		-0.001912	-0.009799	0.005736	0.611		0.000478	-0.008604	0.00956	0.922		0.003107	-0.008365	0.01434	0.594
		IGR*		0.52	0.922		-2.77933	-6.60954	1.05088	0.155		-0.681389	-8.00937	6.64659	0.855		-1.16226	-7.71301	5.38826	0.728		-5.21737	-11.4761	1.04156	0.102
		CIR*		0.632	0.576		-0.011233	-0.028441	0.006214	0.208		-0.007409	-0.039913	0.025095	0.655		0.000717	-0.030353	0.031787	0.962		-0.021271	-0.049234	0.006931	0.138
Obesity		BMI, kg/m2		0.195	0.228		-0.030312	-0.111565	0.050941	0.466		0.035785	-0.08841	0.15998	0.572		-0.068623	-0.189871	0.053046	0.269		-0.057256	-0.23155	0.116617	0.518
		Waist, cm		0.403	0.189		-0.065676	-0.316171	0.184819	0.607		0.117038	-0.263967	0.498043	0.546		-0.191976	-0.60203	0.218078	0.358		-0.041258	-0.549826	0.466889	0.873
		Triglycerides, mg/dl*		0.885	0.619		1.59433	-1.02513	4.21337	0.233		1.88229	-2.77565	6.53981	0.428		2.05153	-2.63588	6.73853	0.391		1.35773	-2.90364	5.61909	0.532
		HbA1c,%*		0.098	0.911		0.005052	-0.007578	0.018103	0.427		-0.002105	-0.027786	0.023997	0.884		-0.002526	-0.022734	0.017261	0.795		0.026102	0.005473	0.047152	0.014
		Fasting Insulin,uU/mL*		0.19	0.805		0.651708	0.101882	1.20111	0.02		0.473204	-0.593189	1.5396	0.384		0.459732	-0.359534	1.279	0.271		0.863892	-0.107355	1.83514	0.081
		Corrected Proinsulin*^		0.679	0.433		-0.002947	-0.00842	0.002526	0.315		-0.005894	-0.016419	0.005052	0.302		0	-0.007999	0.007578	0.975		-0.003789	-0.014314	0.006315	0.452
		ISI*		0.685	0.628		0.000842	-0.004631	0.005894	0.817		-0.000421	-0.007578	0.007157	0.954		0.005052	-0.003789	0.013893	0.253		-0.003789	-0.015156	0.007999	0.539
		IGR*		0.291	0.908		-0.033259	-3.7208	3.65428	0.986		1.58001	-5.2044	8.36485	0.648		0.927463	-5.27681	7.13174	0.769		-3.07793	-9.39883	3.24254	0.339
		CIR*		0.614	0.924		0.002947	-0.013893	0.019366	0.738		0.005473	-0.024418	0.035785	0.712		0.007157	-0.022313	0.036206	0.641		-0.007157	-0.035785	0.02105	0.615
Lipodystrophy		BMI, kg/m2		0.437	0.344		0.050046	-0.032486	0.132578	0.234		0.05268	-0.073313	0.178673	0.412		-0.068045	-0.194038	0.058387	0.291		0.15365	-0.018877	0.326177	0.081
		Waist, cm		0.118	0.453		0.237938	-0.016682	0.492119	0.067		0.164186	-0.22389	0.552262	0.407		-0.208086	-0.633477	0.217305	0.337		0.800297	0.298081	1.30251	0.002
		Triglycerides, mg/dl*		0.455	0.272		1.73405	-0.923217	4.39088	0.201		2.87633	-1.8416	7.59426	0.232		-0.654988	-5.52438	4.2144	0.792		3.24201	-0.982043	7.46607	0.132
		HbA1c,%*		0.386	0.305		0.003512	-0.009658	0.016243	0.616		0.020633	-0.005268	0.046534	0.119		-0.009658	-0.03073	0.010975	0.355		0.001317	-0.019316	0.02195	0.902
		Fasting Insulin,uU/mL*		0.897	0.361		0.379735	-0.178673	0.938582	0.182		0.51802	-0.554018	1.5905	0.343		-0.359102	-1.22262	0.504411	0.414		0.87361	-0.089117	1.8359	0.075
		Corrected Proinsulin*^		0.526	0.069		0.001317	-0.00439	0.007024	0.677		-0.003512	-0.014487	0.007463	0.528		0.008341	0.000439	0.016243	0.042		-0.000878	-0.010975	0.009219	0.868
		ISI*		0.812	0.38		-0.003073	-0.008341	0.002634	0.298		-0.003951	-0.010975	0.003512	0.297		0.003073	-0.006146	0.012292	0.49		-0.006146	-0.01756	0.005268	0.299
		IGR*		0.511	0.845		0.624697	-3.1011	4.35049	0.742		-0.904779	-7.65748	5.84748	0.793		0.055314	-6.41247	6.52354	0.987		2.50449	-3.80964	8.81863	0.436
		CIR*		0.678	0.749		0	-0.017121	0.016682	0.991		-0.00439	-0.034242	0.025901	0.784		-0.003951	-0.034681	0.026779	0.805		0.006585	-0.021511	0.03512	0.638
Liver/Lipid		BMI, kg/m2		0.562	0.662		-0.020352	-0.101376	0.060672	0.621		-0.01536	-0.14208	0.111744	0.814		-0.0384	-0.158592	0.081792	0.53		-0.004224	-0.172416	0.163968	0.96
		Waist, cm		0.335	0.188		-0.214656	-0.463872	0.034176	0.091		-0.096384	-0.484608	0.29184	0.627		-0.509184	-0.913536	-0.104832	0.014		0.010368	-0.480384	0.500736	0.967
		Triglycerides, mg/dl*		0.18	0.579		-4.37146	-6.9815	-1.76141	0.001		-6.25421	-10.9993	-1.50912	0.01		-3.56621	-8.21491	1.08211	0.132		-4.06694	-8.1961	0.061824	0.054
		HbA1c,%*		0.274	0.007		-0.010752	-0.023424	0.00192	0.098		-0.036096	-0.061824	-0.009984	0.006		0.016896	-0.002688	0.036864	0.091		-0.012672	-0.03264	0.00768	0.225
		Fasting Insulin,uU/mL*		0.354	0.103		0.197376	-0.349056	0.743808	0.479		0.655872	-0.430464	1.74182	0.236		-0.336768	-1.15008	0.476544	0.417		0.22656	-0.705408	1.15891	0.633
		Corrected Proinsulin*^		0.005	0.58		-0.00384	-0.009216	0.00192	0.186		0.00384	-0.007296	0.014976	0.51		0.000768	-0.006528	0.008448	0.812		-0.014976	-0.02496	-0.004992	0.003
		ISI*		0.014	0.397		-0.003456	-0.008832	0.001536	0.184		-0.001536	-0.008832	0.00576	0.662		0.00576	-0.003072	0.014208	0.197		-0.014592	-0.025728	-0.003456	0.01
		IGR*		0.614	0.107		0.085248	-3.57197	3.74285	0.963		1.74106	-5.1648	8.64691	0.621		-6.12826	-12.2676	0.011136	0.05		4.75776	-1.29946	10.815	0.124
		CIR*		0.947	0.192		0.002304	-0.014592	0.018816	0.796		0.008832	-0.021504	0.039552	0.564		-0.018048	-0.047232	0.011136	0.22		0.015744	-0.01152	0.043008	0.255
The original scale was used for these results. They were not log-transformed. Adjusted for age, sex, principal components, BMI, and baseline measurement
^ Proginsulin, ng/ml/Insulin, ng/ml

## Sheet: STable 5 whiteonly_1 yr_SD
Supplementary Table 5: Associations with T2D pPS and Year 1 change from baseline in white population only
n=1468				Interaction Tests
				ILS vs PBL	MET vs PBL		Treatment Adjusted					PBL (n=887)					MET (n=875)					ILS (n=885)
GRS		Outcome		P val	P val		Estimate	LowerCL	UpperCL	Probt		Estimate	LowerCL	UpperCL	Probt		Estimate	LowerCL	UpperCL	Probt		Estimate	LowerCL	UpperCL	Probt
Beta Cell		BMI, kg/m2		0.167	0.325		0.03874	-0.0745	0.151384	0.503		0.181184	0.003576	0.359388	0.046		0.01788	-0.146616	0.182376	0.833		-0.049468	-0.293828	0.194892	0.69
		Waist, cm		0.521	0.291		0.117412	-0.215156	0.44998	0.489		0.51554	-0.007152	1.03823	0.053		-0.138868	-0.653812	0.376672	0.597		0.152576	-0.544744	0.8493	0.667
		Triglycerides, mg/dl*		0.341	0.439		2.74577	-0.907112	6.39866	0.141		5.75259	-0.741424	12.2472	0.082		2.46625	-4.12551	9.05741	0.463		0.911284	-5.19891	7.02148	0.77
		HbA1c,%*		0.539	0.168		-0.00298	-0.01788	0.01192	0.684		0.012516	-0.013112	0.038144	0.34		-0.0149	-0.03874	0.009536	0.239		-0.004768	-0.031588	0.022052	0.725
		Fasting Insulin,uU/mL*		0.174	0.188		-0.194296	-0.9387	0.550108	0.609		0.72712	-0.787316	2.24156	0.346		-0.609112	-1.65867	0.44104	0.255		-0.7003	-2.027	0.626396	0.3
		Corrected Proinsulin*^		0.534	0.53		0	-0.008344	0.007748	0.943		0.004172	-0.011324	0.020264	0.581		-0.000596	-0.009536	0.00894	0.934		-0.004172	-0.019668	0.011324	0.577
		ISI*		0.08	0.145		0.007748	0.000596	0.015496	0.039		-0.00298	-0.013112	0.007152	0.552		0.010132	-0.001788	0.022052	0.092		0.015496	-0.001788	0.032184	0.079
		IGR*		0.256	0.217		-6.38852	-9.99313	-2.78392	0.000513239		-9.49964	-16.8287	-2.17123	0.011		-3.94075	-9.61825	1.73674	0.173		-5.0362	-10.8991	0.826056	0.092
		CIR*		0.287	0.387		-0.033972	-0.051852	-0.016092	0.000196091		-0.047084	-0.079268	-0.014304	0.005		-0.026224	-0.055428	0.003576	0.087		-0.028608	-0.0596	0.002384	0.072
Proinsulin		BMI, kg/m2		0.557	0.429		-0.037762	-0.143878	0.068354	0.484		-0.034894	-0.209364	0.139576	0.695		0.063096	-0.093449	0.21988	0.429		-0.11711	-0.335317	0.101097	0.292
		Waist, cm		0.432	0.942		0.021749	-0.291341	0.3346	0.892		0.147463	-0.364953	0.660118	0.572		0.09321	-0.398891	0.58555	0.71		-0.195741	-0.819531	0.428288	0.538
		Triglycerides, mg/dl*		0.113	0.139		0.021271	-3.44041	3.48295	0.99		4.7714	-1.60226	11.145	0.142		-1.63739	-8.01032	4.73555	0.614		-1.97605	-7.46708	3.51521	0.48
		HbA1c,%*		0.006	0.072		-0.000717	-0.014579	0.013145	0.922		0.024856	-0.000239	0.049951	0.053		-0.004063	-0.027485	0.019598	0.742		-0.023183	-0.047322	0.000956	0.059
		Fasting Insulin,uU/mL*		0.877	0.853		0.57121	-0.13384	1.2765	0.112		0.686169	-0.809732	2.18207	0.368		0.710069	-0.307593	1.72773	0.171		0.529146	-0.659162	1.71745	0.382
		Corrected Proinsulin*^		0.3	0.959		0.00239	-0.005019	0.009799	0.529		-0.001195	-0.01673	0.01434	0.884		-0.001195	-0.010277	0.007648	0.782		0.008604	-0.005497	0.022466	0.228
		ISI*		0.727	0.896		-0.00239	-0.00956	0.00478	0.527		-0.003824	-0.014101	0.006214	0.453		-0.004063	-0.015535	0.007409	0.479		0	-0.015296	0.015296	0.991
		IGR*		0.462	0.421		-2.28173	-5.75751	1.19404	0.198		-0.564279	-7.95894	6.83014	0.881		-2.51285	-8.17141	3.14572	0.383		-3.35198	-8.63722	1.93351	0.213
		CIR*		0.978	0.982		-0.010277	-0.027485	0.006692	0.237		-0.014579	-0.047322	0.018403	0.387		-0.005736	-0.035372	0.0239	0.702		-0.011472	-0.039435	0.016491	0.424
Obesity		BMI, kg/m2		0.784	0.629		-0.008841	-0.120406	0.102303	0.874		0.002947	-0.169663	0.175557	0.972		-0.04631	-0.210921	0.118301	0.581		0.008841	-0.230708	0.24839	0.942
		Waist, cm		0.519	0.47		-0.156612	-0.484992	0.171768	0.35		-0.007157	-0.516988	0.502674	0.978		-0.230708	-0.746433	0.285017	0.38		-0.157033	-0.842421	0.528776	0.653
		Triglycerides, mg/dl*		0.962	0.901		1.98123	-1.63895	5.6014	0.283		1.97491	-4.33209	8.28191	0.539		1.3152	-5.38459	8.015	0.7		2.86448	-3.15582	8.88521	0.35
		HbA1c,%*		0.522	0.685		-0.006315	-0.02105	0.007999	0.392		-0.010104	-0.035364	0.014735	0.42		-0.005894	-0.030733	0.018524	0.634		0.000842	-0.025681	0.027365	0.955
		Fasting Insulin,uU/mL*		0.509	0.948		1.05376	0.319118	1.78841	0.005		0.956091	-0.518672	2.43085	0.203		0.851262	-0.201238	1.90376	0.113		1.38341	0.082095	2.68472	0.037
		Corrected Proinsulin*^		0.586	0.426		-0.005473	-0.013472	0.002105	0.166		-0.010104	-0.02526	0.005473	0.2		-0.002105	-0.011367	0.007157	0.676		-0.004631	-0.019787	0.010525	0.556
		ISI*		0.34	0.478		-0.002526	-0.009683	0.005052	0.545		-0.001684	-0.011367	0.00842	0.77		0.005894	-0.005894	0.017682	0.333		-0.010525	-0.027365	0.005894	0.211
		IGR*		0.56	0.717		-1.62927	-5.22798	1.96944	0.375		-1.70589	-8.93362	5.52226	0.643		-0.179767	-5.97778	5.61824	0.951		-4.03781	-9.80593	1.73073	0.17
		CIR*		0.619	0.899		0.001684	-0.015998	0.019366	0.868		0.000421	-0.031575	0.032838	0.971		0.005473	-0.02526	0.035785	0.734		-0.007999	-0.038732	0.022313	0.605
Lipodystrophy		BMI, kg/m2		0.151	0.894		0.019755	-0.093946	0.133017	0.735		-0.023267	-0.201501	0.154528	0.796		-0.054875	-0.225207	0.115018	0.525		0.135212	-0.103604	0.374028	0.266
		Waist, cm		0.269	0.353		0.188331	-0.146626	0.523727	0.27		0.207647	-0.317836	0.73313	0.438		-0.207208	-0.741032	0.326177	0.446		0.669914	-0.012731	1.35256	0.054
		Triglycerides, mg/dl*		0.549	0.428		1.30822	-2.36577	4.98177	0.485		3.44571	-3.02032	9.9113	0.296		-0.554896	-7.42481	6.31458	0.874		0.796785	-5.16088	6.75445	0.793
		HbA1c,%*		0.398	0.93		-0.006585	-0.021072	0.008341	0.386		-0.01317	-0.039071	0.012292	0.31		-0.015804	-0.041266	0.009219	0.217		0.005268	-0.020633	0.031608	0.682
		Fasting Insulin,uU/mL*		0.836	0.321		-0.021072	-0.766494	0.723911	0.956		0.276131	-1.21954	1.77137	0.717		-0.719521	-1.80648	0.367882	0.194		0.385003	-0.913998	1.684	0.56
		Corrected Proinsulin*^		0.914	0.246		-0.000439	-0.008341	0.007463	0.945		-0.00439	-0.020194	0.010975	0.578		0.008341	-0.000878	0.017999	0.082		-0.003512	-0.018438	0.011853	0.662
		ISI*		0.732	0.659		0.000878	-0.006585	0.00878	0.794		-0.002634	-0.012731	0.007463	0.631		0.003512	-0.00878	0.015804	0.564		0.002634	-0.014048	0.019316	0.772
		IGR*		0.56	0.929		-0.474998	-4.08402	3.13402	0.796		0.413977	-6.78694	7.61445	0.91		-0.185697	-6.13502	5.76363	0.951		-2.21036	-7.94107	3.52078	0.449
		CIR*		0.639	0.949		-0.002634	-0.020633	0.014926	0.764		0	-0.031608	0.032047	0.99		-0.003951	-0.035559	0.027218	0.794		-0.009658	-0.039949	0.020633	0.531
Liver/Lipid		BMI, kg/m2		0.239	0.963		0.036864	-0.072576	0.146304	0.508		-0.03648	-0.210048	0.137472	0.681		-0.014976	-0.172032	0.142464	0.853		0.133248	-0.1056	0.37248	0.273
		Waist, cm		0.144	0.304		-0.173184	-0.495744	0.149376	0.293		-0.236928	-0.746112	0.27264	0.362		-0.585216	-1.07558	-0.094848	0.019		0.387072	-0.296064	1.07021	0.266
		Triglycerides, mg/dl*		0.427	0.386		-4.06426	-7.63853	-0.489984	0.026		-7.04448	-13.3997	-0.68928	0.03		-3.02093	-9.41107	3.36883	0.353		-3.61114	-9.6457	2.42381	0.24
		HbA1c,%*		0.237	0.028		0.00192	-0.012672	0.016128	0.811		-0.018432	-0.043392	0.006528	0.151		0.02112	-0.002304	0.044544	0.078		0.001152	-0.025344	0.027648	0.93
		Fasting Insulin,uU/mL*		0.349	0.298		0.511872	-0.211584	1.23494	0.165		1.07021	-0.39936	2.53978	0.153		0.187776	-0.824832	1.20038	0.716		0.132096	-1.17274	1.43731	0.842
		Corrected Proinsulin*^		0.005	0.69		-0.008064	-0.015744	-0.000384	0.04		0.002304	-0.013056	0.017664	0.781		-0.00192	-0.010752	0.006912	0.678		-0.024576	-0.039936	-0.0096	0.001
		ISI*		0.008	0.617		-0.008448	-0.015744	-0.001152	0.026		-0.002304	-0.012288	0.00768	0.638		0.004224	-0.007296	0.015744	0.467		-0.026496	-0.043008	-0.009984	0.002
		IGR*		0.743	0.162		-0.9024	-4.43904	2.63386	0.617		-0.052992	-7.25376	7.14778	0.988		-5.8537	-11.4217	-0.285696	0.039		3.07814	-2.65997	8.81664	0.292
		CIR*		0.665	0.423		0.00192	-0.01536	0.0192	0.824		0.000384	-0.031872	0.032256	0.985		-0.013824	-0.043392	0.01536	0.35		0.0192	-0.011136	0.049536	0.211
		^ Proginsulin, ng/ml/Insulin, ng/ml
		The original scale was used for these results. They were not log-transformed. Adjusted for age, sex, principal components, and baseline measurement

## Sheet: STable 6 Diabetes incidence_SD
Supplementary Table 6: Associations of pPS with 1 year diabetes incidence
ALL (n=2647)			Met vs PBL	ILS vs PBL		Adjusted by treatment group (n=2647)					PBL (n=887)					MET (n=875)					ILS (n=885)
Model 1	pPS		P val Int	P val Int		P val	HR	Lower	Upper		P val	HR	Lower	Upper		P val	HR	Lower	Upper		P val	HR	Lower	Upper
	Beta Cell		0.814	0.178		0.1068	1.07368	0.982253	1.17891		0.1802	1.09922	0.958998	1.26334		0.0406	1.17891	1.00597	1.37589		0.5546	0.947543	0.788917	1.13849
	Pro insulin		0.348	0.946		0.0717	1.09071	0.992845	1.20194		0.6816	1.03135	0.891317	1.19133		0.1551	1.13394	0.952863	1.3506		0.2798	1.11602	0.913833	1.35915
	Obesity		0.283	0.478		0.1593	1.06469	0.974982	1.16528		0.9926	1	0.875837	1.1418		0.066	1.15584	0.991607	1.3506		0.3945	1.08694	0.898896	1.31393
	Lipodystrophy		0.095	0.274		0.3382	1.04465	0.956838	1.14342		0.6067	0.965353	0.843604	1.10498		0.0708	1.1581	0.986897	1.35692		0.2638	1.11449	0.919236	1.35137
	Liver/Lipid		0.875	0.865		0.7683	0.988529	0.903788	1.07901		0.6987	0.973386	0.848093	1.11603		0.7128	0.973386	0.834576	1.12857		0.8979	1.01157	0.841314	1.2149
Model 2	Beta Cell		0.742	0.207		0.0352	1.09922	1.00597	1.19956		0.1112	1.11871	0.976395	1.28521		0.0277	1.19264	1.01801	1.39938		0.8255	0.976395	0.813699	1.17891
	Pro insulin		0.468	0.95		0.0654	1.09575	0.995227	1.2046		0.6007	1.04111	0.898037	1.20727		0.1663	1.13137	0.950541	1.34775		0.254	1.12368	0.918375	1.37348
	Obesity		0.184	0.403		0.2447	1.05588	0.962654	1.15115		0.7325	0.974982	0.853231	1.11869		0.0636	1.16055	0.991607	1.3506		0.4975	1.06911	0.883472	1.29332
	Lipodystrophy		0.075	0.281		0.1518	1.06754	0.973927	1.17292		0.7692	0.978235	0.855214	1.12407		0.0504	1.17292	1	1.37929		0.1985	1.13371	0.935804	1.37367
	Liver/Lipid		0.941	0.859		0.7555	0.984727	0.903788	1.07901		0.6778	0.969627	0.848093	1.11187		0.7242	0.973386	0.83794	1.13278		0.8937	1.01157	0.841314	1.21934
White (n=1468)						Adjusted by treatment group (n=1468)					PBL (n=490)					MET (n=503)					ILS (n=475)
Model 1	pPS		P val Int	P val Int		P val					P val	HR	Lower	Upper		P val	HR	Lower	Upper		P val	HR	Lower	Upper
	Beta Cell		0.808	0.095		0.1922	1.08002	0.964768	1.21349		0.1381	1.14514	0.958998	1.37589		0.1125	1.17891	0.964768	1.43926		0.2034	0.854695	0.665683	1.09279
	Pro insulin		0.474	0.412		0.3076	1.06079	0.945906	1.19133		0.9993	1	0.836449	1.19663		0.3291	1.11093	0.900284	1.37061		0.1667	1.1834	0.932082	1.50336
	Obesity		0.589	0.329		0.1695	1.08694	0.96675	1.22311		0.7927	1.0255	0.856967	1.22311		0.3278	1.10955	0.902784	1.36656		0.081	1.24784	0.974982	1.59332
	Lipodystrophy		0.391	0.836		0.5243	1.04012	0.923357	1.16796		0.9515	1.0044	0.839761	1.20301		0.3456	1.10498	0.894809	1.36807		0.6611	1.05376	0.828313	1.34033
	Liver/Lipid		0.393	0.834		0.7054	1.02324	0.910935	1.14546		0.5439	1.05484	0.886101	1.26441		0.513	0.936279	0.766206	1.14546		0.3401	1.12438	0.882595	1.4269
Model 2	Beta Cell		0.655	0.122		0.0597	1.11871	0.994055	1.25611		0.0821	1.17209	0.982253	1.40728		0.0459	1.23465	1.00597	1.52186		0.3253	0.88118	0.682856	1.13186
	Pro insulin		0.538	0.389		0.2833	1.06575	0.948222	1.19928		0.9556	1.00479	0.834297	1.20993		0.372	1.09827	0.893554	1.35344		0.1412	1.20194	0.941285	1.5369
	Obesity		0.441	0.237		0.2973	1.06469	0.946401	1.19875		0.9139	0.991607	0.823786	1.18911		0.367	1.10047	0.891159	1.36122		0.0969	1.22802	0.962654	1.56944
	Lipodystrophy		0.444	0.915		0.1993	1.08147	0.961088	1.21827		0.5822	1.05376	0.874839	1.27024		0.2143	1.1483	0.923357	1.42488		0.571	1.07217	0.843604	1.36807
	Liver/Lipid		0.473	0.492		0.711	1.02324	0.910935	1.14546		0.64	1.0429	0.872137	1.24624		0.5968	0.9473	0.77571	1.15825		0.3278	1.12857	0.886101	1.43692
Model 1: adjusted for sex, age at randomization, principal components
Model 2: adjusted for sex, age at randomization, principal components and BMI
